# Supplementary material
Source: PubMed Central journal article supplement (PMC5373460)
Supplement: ASN.2016060666SupplementaryData.pdf [file ASN.2016060666SupplementaryData.pdf]

**Supplemental Figure:** Nomogram depicting effects of alterations in afferent and efferent arteriolar resistance on filtration fraction

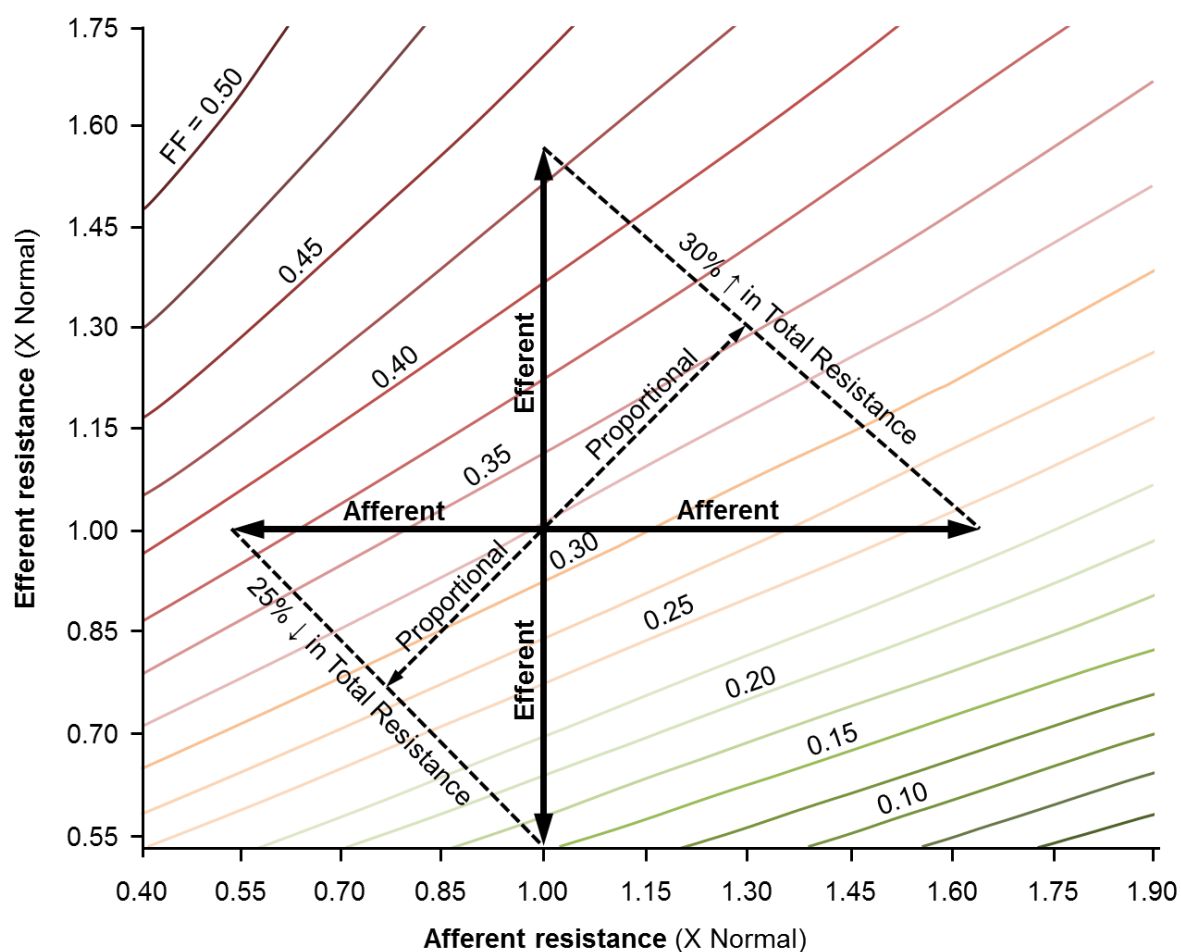

Adapted from Carmines and colleagues.<sup>1</sup> Nomogram portraying the effects of afferent and efferent arteriolar resistance alterations on filtration fraction (FF). Solid lines illustrate effects of pure changes in either afferent or efferent arteriolar resistance. Broken lines show predicted effects of change in total resistance with equal distribution between afferent and efferent sites. Data were generated for the dog assuming constant mean arterial pressure, hematocrit, glomerular filtration coefficient, proximal tubular pressure, peritubular capillary pressure and plasma protein concentration.

## References

1. Carmines PK, Perry MD, Hazelrig JB, Navar LG: Effects of preglomerular and postglomerular vascular resistance alterations on filtration fraction. *Kidney Int Suppl* 20:S229-S232, 1987
